# Supplementary material for: Morphological and Molecular Identification of Dactylonectria macrodidyma as Causal Agent of a Severe Prunus lusitanica Dieback in Italy
Source: MDPI journal article supplement (doi:10.3390/horticulturae9020145), 2023-01-21
Supplement: s1 [file s1]

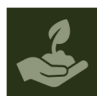

# Morphological and Molecular Identification of *Dactylonectria macrodidyma* as Causal Agent of a Severe *Prunus lusitanica* Dieback in Italy

Susanna Pecchia<sup>1,2\*</sup>, Benedetta Caggiano<sup>1</sup>, Daniele Da Lio<sup>1</sup>, Emilio Resta<sup>3</sup>

<sup>1</sup> Department of Agriculture, Food and Environment (DAFE), University of Pisa, Via del Borghetto 80, 56124 Pisa, Italy

<sup>2</sup> CIRSEC, Centre for Climate Change Impact, University of Pisa, Via del Borghetto 80, 56124 Pisa, Italy

<sup>3</sup> Associazione Vivaisti Italiani, Via G. Deledda 30/7, 51100 Pistoia, Italy

\* Correspondence: susanna.pecchia@unipi.it

**Citation:** Pecchia, S.; Caggiano, B.; Da Lio, D.; Resta, E. Morphological and Molecular Identification of *Dactylonectria macrodidyma* as Causal Agent of a Severe *Prunus lusitanica* Dieback in Italy. *Horticulturae* **2023**, *9*, 145. <https://doi.org/10.3390/horticulturae9020145>

Academic Editor: Harald Scherm

Received: 23 December 2022

Revised: 15 January 2023

Accepted: 18 January 2023

Published: 21 January 2023

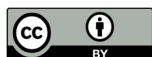

**Copyright:** © 2023 by the authors. Licensee MDPI, Basel, Switzerland. This article is an open access article distributed under the terms and conditions of the Creative Commons Attribution (CC BY) license (<https://creativecommons.org/licenses/by/4.0/>).

**Table S1.** *Campylocarpon*, *Dactylonectria*, *Ilyonectria* and *Neonectria* species used for phylogenetic analysis.

| Species                             | Isolate code        | Source                          | GenBank accession No. |                 |                 |
|-------------------------------------|---------------------|---------------------------------|-----------------------|-----------------|-----------------|
|                                     |                     |                                 | ITS                   | TUB2            | HIS3            |
| <i>Campylocarpon fasciculare</i>    | CBS 112613          | <i>Vitis vinifera</i>           | AY677301              | AY677221        | JF735502        |
| <i>Dactylonectria estremocensis</i> | CBS 129085          | <i>Vitis vinifera</i>           | JF735320              | JF735448        | JF735617        |
|                                     | CPC 13539           | <i>Picea glauca</i>             | JF735330              | JF735458        | JF735627        |
| <i>D. macrodidyma</i>               | CBS 112601          | <i>Vitis vinifera</i>           | AY677284              | AY677229        | JF735644        |
|                                     | CBS 112615          | <i>Vitis vinifera</i>           | AY677290              | AY677233        | JF735647        |
|                                     | EFA 446             | <i>Vitis vinifera</i>           | MF440371              | MF797794        | MF471474        |
|                                     | CBS 112594          | <i>Vitis vinifera</i>           | AY677282              | AY677231        | JF735643        |
|                                     | CBS 112603          | <i>Vitis vinifera</i>           | AY677285              | JF735469        | JF735645        |
|                                     | CBS 112605          | <i>Vitis vinifera</i>           | AY677287              | AY677230        | JF735646        |
|                                     | CPC 20709           | <i>Protea</i> sp.               | JX231163              | JX231115        | JX231147        |
|                                     | <b>DAFE SP16-21</b> | <b><i>Prunus lusitanica</i></b> | <b>MK411344</b>       | <b>MK411343</b> | <b>OP902554</b> |
|                                     | <b>DAFE SP16-22</b> | <b><i>Prunus lusitanica</i></b> | <b>OP890305</b>       | <b>OP902552</b> | <b>OP902553</b> |
|                                     | CBS 100819          | <i>Erica melanthera</i>         | EF607090              | EF607067        | JF735582        |
| <i>D. pauciseptata</i>              | CBS 120171          | <i>Vitis</i> sp.                | EF607089              | EF607066        | JF735587        |
|                                     | CBS 119.41          | <i>Fragaria</i> sp.             | JF735349              | JF735478        | JF735657        |
| <i>D. torresensis</i>               | CBS 129086          | <i>Vitis vinifera</i>           | JF735362              | JF735492        | JF735681        |
|                                     | CBS 129082          | <i>Vitis vinifera</i>           | JF735303              | JF735431        | JF735580        |
| <i>D. vitis</i>                     | CBS 129082          | <i>Vitis vinifera</i>           | JF735303              | JF735431        | JF735580        |
| <i>Ilyonectria coprosmae</i>        | CBS 119606          | <i>Metrosideros</i> sp.         | JF735260              | JF735373        | JF735505        |
| <i>I. crassa</i>                    | CBS 139.30          | <i>Lilium</i> sp.               | JF735275              | JF735393        | JF735534        |
|                                     | CBS 158.31          | <i>Narcissus</i> sp.            | JF735276              | JF735394        | JF735535        |
| <i>I. cyclaminicola</i>             | CBS 302.93          | <i>Cyclamen</i> sp.             | JF735304              | JF735432        | JF735581        |
| <i>I. europaea</i>                  | CBS 129078          | <i>Vitis vinifera</i>           | JF735294              | JF735421        | JF735567        |
|                                     | CBS 537.92          | <i>Aesculus hippocastanum</i>   | EF607079              | EF607064        | JF735568        |
| <i>I. liliigena</i>                 | CBS 189.49          | <i>Lilium regale</i>            | JF735297              | JF735425        | JF735573        |
|                                     | CBS 304.85          | <i>Lilium</i> sp.               | JF735299              | JF735427        | JF735575        |
| <i>I. liriodendri</i>               | CBS 110.81          | <i>Liriodendron tulipifera</i>  | DQ178163              | DQ178170        | JF735507        |
|                                     | CBS 117527          | <i>Vitis vinifera</i>           | DQ178165              | DQ178172        | JF735509        |
| <i>I. lusitanica</i>                | CBS 129080          | <i>Vitis vinifera</i>           | JF735296              | JF735423        | JF735570        |
| <i>I. mors-panacis</i>              | CBS 306.35          | <i>Panax quinquefolium</i>      | JF735288              | JF735414        | JF735557        |
|                                     | CBS 124662          | <i>Panax ginseng</i>            | JF735290              | JF735416        | JF735559        |
| <i>I. pseudodestructans</i>         | CBS 117812          | <i>Quercus</i> sp.              | JF735291              | JF735418        | JF735561        |
|                                     | CBS 117824          | <i>Quercus</i> sp.              | JF735292              | JF735419        | JF735562        |
|                                     | CBS 129081          | <i>Vitis vinifera</i>           | AJ875330              | AM419091        | JF735563        |
| <i>I. robusta</i>                   | CBS 308.35          | <i>Panax quinquefolium</i>      | JF735264              | JF735377        | JF735518        |
|                                     | CBS 129084          | <i>Vitis vinifera</i>           | JF735273              | JF735391        | JF735532        |
| <i>I. rufa</i>                      | CBS 153.37          | Dune sand                       | AY677271              | AY677251        | JF735540        |
|                                     | CBS 640.77          | <i>Abies alba</i>               | JF735277              | JF735399        | JF735542        |
| <i>I. venezuelensis</i>             | CBS 102032          | Bark                            | AM419059              | AY677255        | JF735571        |
| <i>Neonectria ditissima</i>         | CBS 226.31          | <i>Fagus sylvatica</i>          | JF735309              | DQ789869        | JF735594        |
|                                     | CBS 835.97          | <i>Salix cinerea</i>            | JF735310              | DQ789880        | JF735595        |
| <i>N. major</i>                     | CBS 240.29          | <i>Alnus incana</i>             | JF735308              | DQ789872        | JF735593        |
| <i>N. neomacrospora</i>             | CBS 118984          | <i>Arceuthobium tsugense</i>    | JF735311              | DQ789882        | JF735598        |
| <i>N. ramulariae</i>                | CBS 151.29          | <i>Malus sylvestris</i>         | JF735313              | JF735438        | JF735602        |
|                                     | CBS 182.36          | <i>Malus sylvestris</i>         | JF735314              | JF735439        | JF735603        |

---

**Disclaimer/Publisher’s Note:** The statements, opinions and data contained in all publications are solely those of the individual author(s) and contributor(s) and not of MDPI and/or the editor(s). MDPI and/or the editor(s) disclaim responsibility for any injury to people or property resulting from any ideas, methods, instructions or products referred to in the content.
